# Supplementary material for: Molecular Characterization and Functional Analysis of GPCR Gene Bx-srh-1 in Pinewood Nematode (Bursaphelenchus xylophilus)
Source: MDPI journal article supplement (doi:10.3390/f14071282), 2023-06-21
Supplement: s1 [file s1]

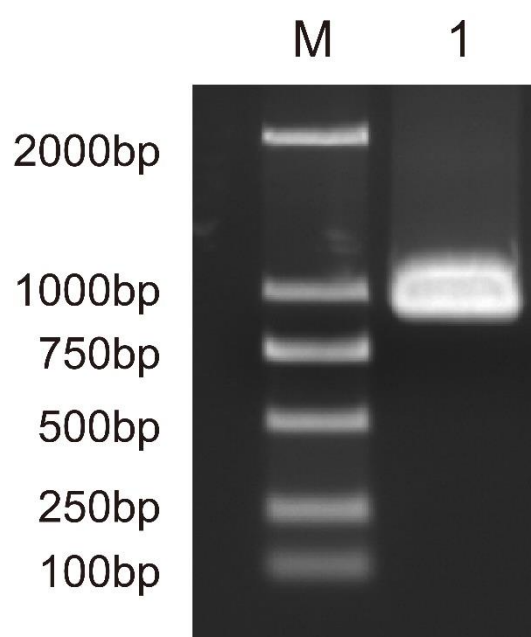

**Figure S1.** Agarose gel electrophoresis of the coding sequences of *Bx-srh-1*. M: DL2000 DNA Marker; 1: *Bx-srh-1*.

**Table S1.** PCR primers used in the study

| Primer                    |                       | Sequence (5'→3')                                |
|---------------------------|-----------------------|-------------------------------------------------|
| Coding of <i>Bx-srh-1</i> | <i>Bx-srh-1</i> -F    | ATGCAAAATATCACATTCTACGACG                       |
|                           | <i>Bx-srh-1</i> -R    | TTAGATCGCACGGTTTCCTCC                           |
| Coding for sequencing     | M13-F                 | CGCCAGGGTTTTCCAGTCACGAC                         |
|                           | M13-R                 | AGCGGATAACAATTCACACAGGA                         |
| FISH probes               | Antisense probes      | CGGTGACATATCTGCGCAGTGCCATGTTGTTGCCAGGGAAGTCG    |
|                           | Sense probe           | AGGCGTCGGTGATTTTTTGGGTCCTCCTTC CGCTGTTGGTGATTC  |
|                           | <i>iBx-srh-1</i> T7-F | <u>TAATACGACTCACTATAGGGGTGCTCACAGTGCTGGTCAT</u> |
| Synthesis of dsRNA        | <i>iBx-srh-1</i> -R   | TCGAGAAAATTGCTCTCCGT                            |
|                           | <i>iBx-srh-1</i> T7-R | <u>TAATACGACTCACTATAGGGTCGAGAAAATTGCTCTCCGT</u> |
|                           | <i>iBx-srh-1</i> -F   | GTGCTCACAGTGCTGGTCAT                            |
|                           | <i>iBxgfp</i> -F      | <u>TAATACGACTCACTATAGGGATGAGTAAAGGAGAAG</u>     |
|                           | <i>iBxgfp</i> -R      | <u>TAATACGACTCACTATAGGGTTTGTATAGTTCATCCATG</u>  |
|                           | <i>qBx-srh-1</i> -F   | CGGTGGGATCGAGTAGTGTG                            |
| qRT-PCR                   | <i>qBx-srh-1</i> -R   | ATCGCACGGTTTCCTCCATT                            |
|                           | <i>qBxActin</i> -F    | GCAACACGGAGTTCGTTGTAGA                          |
|                           | <i>qBxActin</i> -R    | GTATCGTCACCAACTGGGATGA                          |

**Table S2.** Accession number of protein sequences from NCBI

| Species                             | Accession number |
|-------------------------------------|------------------|
| <i>Bursaphelenchus okinawaensis</i> | CAD5231129.1     |
| <i>Aphelenchus avenae</i>           | KAH7717132.1     |
| <i>Ditylenchus destructor</i>       | KAI1706001.1     |
| <i>Aphelenchoides besseyi</i>       | KAI6216494.1     |
| <i>Caenorhabditis elegans</i>       | CAE11313.2       |
| <i>Caenorhabditis briggsae</i>      | XP_045097811.1   |
